# Supplementary material for: Intermittent theta-burst stimulation (iTBS) Modulates Abnormal Brain Activity During Emotional Arousal in Adolescent Depression
Source: Research Square preprint supplement (doi:10.21203/rs.3.rs-8011953/v1), 2025-12-08
Supplement: Supplementary file 1 [file 64da3370f07569921f2aeb1d.docx]

**Supplemental materials**

1. **Participant Screening Criteria for Adolescent Depression Patients:​**​

**① Inclusion Criteria:​**​

A. Aged 12–18 years;

B. Diagnosed with depressive disorder by a psychiatrist according to DSM-5 criteria, with confirmation via MINI-KID interview;

C. Montgomery-Asberg Depression Rating Scale (MARDS) score ≥14;

D. Signed informed consent form.

​**​② Exclusion Criteria:​**​

A. Presence of metallic implants above the chest, particularly intracranial or cardiac devices;

B. Severe neurological disorders (e.g., epilepsy, stroke, encephalitis, traumatic brain injury) or major systemic illnesses (e.g., malignant tumors, acute heart failure, multi-organ failure);

C. Current psychotic symptoms;

D. History of substance or alcohol abuse within the past year;

E. Language or communication barriers impairing comprehension, adherence to instructions, or ability to cooperate with treatment/assessment;

F. Deemed ineligible by the clinician or investigator;

G. Failure to sign informed consent.

​**​③ Withdrawal/Discontinuation Criteria:​**​

A. Participant withdrawal of informed consent;

B. Intolerable adverse events or severe complications;

C. Failure to meet quality control standards for MRI scans;

D. Loss to follow-up.

**2. Naturalistic Stimuli Video Content​**​
The thematic content of the five naturalistic video segments is summarized as follows:

- ​**​Segment 1:​**​ Two milk cartons fall in love but are forcibly separated.
- ​**​Segment 2:​**​ A documentary covering 50 years of freedom struggle.
- ​**​Segment 3:​**​ A single mother disguises herself as a man to drive a taxi while caring for her son.
- ​**​Segment 4:​**​ A girl transferring to a new school and cries during a class presentation.
- ​**​Segment 5:​**​ A father who performs extensive manual labor maintains a pretense of wealth and happiness before his daughter.

**3. Post-Viewing Recall Task​**​
Participants were required to answer the following five questions after watching the stimuli:

1. In Story 1, did the red and blue milk cartons ultimately end up together?
2. In Story 2, were any individuals injured?
3. In Story 3, was the parent a dock worker?
4. In Story 4, did the young girl cry in the end?
5. In Story 5, did the father work diligently?
